# Supplementary material
Source: PubMed Central journal article supplement (PMC7964402)
Supplement: 2837_tables.pdf [file 2837_tables.pdf]

**On-line Table 1: Characteristics of patients and healthy control subjects**

|                       | Patients<br>( <i>n</i> = 36) |      | Control Subjects<br>( <i>n</i> = 23) |     |
|-----------------------|------------------------------|------|--------------------------------------|-----|
|                       | Mean                         | SD   | Mean                                 | SD  |
| Age (yr)              | 59.5                         | 7.5  | 59.9                                 | 6.7 |
| Sex                   | 21 M/15 F                    |      | 9 M/14 F                             |     |
| Education (yr)        | 10.7                         | 2.8  | 11.6                                 | 3.2 |
| Disease duration (yr) | 5.8                          | 3.9  | N/A                                  | N/A |
| UPDRS (score)         | 41.9                         | 20.7 | N/A                                  | N/A |
| H&Y stage             | 2.3                          | 0.9  | N/A                                  | N/A |
| MMSE                  | 28.6                         | 1.4  | 29.1                                 | 0.9 |

**Note:**—NA indicates not applicable.

**On-line Table 2: GM density, volume, and MTR: group comparisons**

|                                                              | MNI Coordinates |     |     | Z Value | P FWE-Corrected <sup>a</sup> | Cluster Size (vx) |
|--------------------------------------------------------------|-----------------|-----|-----|---------|------------------------------|-------------------|
|                                                              | X               | Y   | Z   |         |                              |                   |
| Control ( <i>n</i> = 23) and patient groups ( <i>n</i> = 36) |                 |     |     |         |                              |                   |
| GM volume effects                                            |                 |     |     |         |                              |                   |
| Left parahippocampal gyrus                                   | −34             | −58 | −7  | 4.32    | .05                          | 1170              |
| GM density effects                                           |                 |     |     |         |                              |                   |
| Left parahippocampal gyrus                                   | −28             | −49 | −9  | 4.17    | .05                          | 2084              |
| MTR effects                                                  |                 |     |     |         |                              |                   |
| Left olfactory cortex/amygdala <sup>b</sup>                  | −16             | −3  | −19 | 3.10    | .05 <sup>c</sup>             |                   |
| Left parahippocampal gyrus                                   | −31             | −51 | −8  | 4.29    | .05                          | 2272              |
| Control group ( <i>n</i> = 23) <sup>d</sup>                  |                 |     |     |         |                              |                   |
| No GM volume, density, or MTR effects                        |                 |     |     |         |                              |                   |
| Control group ( <i>n</i> = 23) <sup>e</sup>                  |                 |     |     |         |                              |                   |
| No GM volume or density effects                              |                 |     |     |         |                              |                   |
| MTR effects                                                  |                 |     |     |         |                              |                   |
| Left olfactory cortex/amygdala <sup>b</sup>                  | −15             | −1  | −18 | 3.19    | .05 <sup>c</sup>             |                   |
| Control group ( <i>n</i> = 23) <sup>f</sup>                  |                 |     |     |         |                              |                   |
| GM volume effects                                            |                 |     |     |         |                              |                   |
| Left parahippocampal gyrus                                   | −25             | −45 | −9  | 4.43    | .05                          | 1110              |
| GM density effects                                           |                 |     |     |         |                              |                   |
| Left parahippocampal gyrus                                   | −25             | −44 | −10 | 4.96    | .001                         | 4218              |
| MTR effects                                                  |                 |     |     |         |                              |                   |
| Left olfactory cortex <sup>b</sup>                           | −10             | 19  | −24 | 3.31    | .05 <sup>c</sup>             |                   |
| Left parahippocampal gyrus                                   | −26             | −47 | −10 | 5.10    | .0001                        | 13 873            |
| Right STG <sup>b</sup>                                       | 62              | −28 | 23  | 3.85    | .05                          | 2620              |
| Patient subgroup in H&Y 1 ( <i>n</i> = 9) <sup>g</sup>       |                 |     |     |         |                              |                   |
| No GM volume or density effects                              |                 |     |     |         |                              |                   |
| MTR effects                                                  |                 |     |     |         |                              |                   |
| Left olfactory cortex (subcallosal area) <sup>b</sup>        | 1               | 24  | −3  | 3.26    | .05 <sup>c</sup>             |                   |
| Patient subgroup in H&Y 2 ( <i>n</i> = 13) <sup>h</sup>      |                 |     |     |         |                              |                   |
| No GM volume or density effects                              |                 |     |     |         |                              |                   |
| Left olfactory cortex                                        | −13             | 18  | −23 | 4.07    | .05 <sup>c</sup>             |                   |
| MTR effects                                                  |                 |     |     |         |                              |                   |
| Left olfactory cortex                                        | −14             | 23  | −24 | 4.17    | .05 <sup>c</sup>             |                   |
| Right STG <sup>b</sup>                                       | 68              | −17 | 12  | 4.03    | .05                          | 3784              |

**Note:**—MNI indicates Montreal Neurologic Institute.

<sup>a</sup> Cluster-level-corrected, aside from footnote c.

<sup>b</sup> Additional effects on MTR images.

<sup>c</sup> ROI analysis of the olfactory cortex, which was voxel-level corrected.

<sup>d</sup> and Patient subgroup in H&Y stage 1 (*n* = 9).

<sup>e</sup> Patient subgroup in H&Y stage 2 (*n* = 13).

<sup>f</sup> Patient subgroup in H&Y stages 3 and 4 (*n* = 14).

**On-line Table 3: Midbrain density, volume, and MTR: group comparisons<sup>b</sup>**

|                                                              | MNI coordinates |     |     | Z Value | P FWE-Corrected <sup>a</sup> |
|--------------------------------------------------------------|-----------------|-----|-----|---------|------------------------------|
|                                                              | X               | Y   | Z   |         |                              |
| Control ( <i>n</i> = 23) and patient groups ( <i>n</i> = 36) |                 |     |     |         |                              |
| No density effects                                           |                 |     |     |         |                              |
| Volume effects                                               |                 |     |     |         |                              |
| Left SN                                                      | -2              | -8  | -13 | 3.25    | .05                          |
| MTR effects                                                  |                 |     |     |         |                              |
| Left SN                                                      | -5              | -10 | -12 | 3.34    | .05                          |
| Right SN <sup>b</sup>                                        | 5               | -11 | -9  | 2.96    | .05                          |
| Control group ( <i>n</i> = 23) <sup>c</sup>                  |                 |     |     |         |                              |
| No volume, density, or MTR effects                           |                 |     |     |         |                              |
| Control group ( <i>n</i> = 23) <sup>d</sup>                  |                 |     |     |         |                              |
| Volume effects                                               |                 |     |     |         |                              |
| Left SN                                                      | -4              | -11 | -13 | 3.53    | .01                          |
| Density effects                                              |                 |     |     |         |                              |
| Left SN                                                      | -6              | -8  | -12 | 3.79    | .01                          |
| MTR effects                                                  |                 |     |     |         |                              |
| Left SN                                                      | -6              | -9  | -12 | 4.10    | .01                          |
| Right SN <sup>b</sup>                                        | 6               | -10 | -11 | 2.80    | .05                          |
| Control group ( <i>n</i> = 23) <sup>e</sup>                  |                 |     |     |         |                              |
| Volume effects                                               |                 |     |     |         |                              |
| Left SN                                                      | -4              | -12 | -10 | 3.17    | .05                          |
| Density effects                                              |                 |     |     |         |                              |
| Left SN                                                      | -4              | -13 | -12 | 3.15    | .05                          |
| MTR effects                                                  |                 |     |     |         |                              |
| Left SN                                                      | -4              | -12 | -10 | 3.18    | .05                          |

**Note:**—MNI indicates Montreal Neurologic Institute.

<sup>a</sup> ROI analysis of the SN.

<sup>b</sup> Additional effects on MTR images.

<sup>c</sup> and Patient subgroup in H&Y stage 1 (*n* = 9).

<sup>d</sup> Patient subgroup in H&Y stage 2 (*n* = 13).

<sup>e</sup> Patient subgroup in H&Y stages 3 and 4 (*n* = 14).

**On-line Table 4: Tissue volume, density, and MTR: correlations with UPDRS score in patient group**

|                                              | MNI Coordinates |     |    | Z Value | P FWE-Corrected | Cluster Size (vx) |
|----------------------------------------------|-----------------|-----|----|---------|-----------------|-------------------|
|                                              | X               | Y   | Z  |         |                 |                   |
| No correlations with GM/WM volume or density |                 |     |    |         |                 |                   |
| Negative correlation with MTR                |                 |     |    |         |                 |                   |
| Right STG <sup>a</sup>                       | 66              | -29 | -3 | 4.16    | .05             | 3405              |
| Right ILF <sup>a</sup>                       | 38              | -34 | -7 | 3.87    | .05             | 2218              |

**Note:**—MNI indicates Montreal Neurologic Institute.

<sup>a</sup> Additional effects on MTR images.
